# Supplementary material
Source: PubMed Central journal article supplement (PMC3404391)
Supplement: NIHMS393137-supplement-01.pdf [file NIHMS393137-supplement-01.pdf]

# Supplementary Figure

a.

VEEFKKSSATEEVISKNLEVDLLKNVDTSAKRRENGAPVLGKNTLQSLEKIKTSASVNAKAAAVVKASALALAEAYLRASALSAAASA  
KAAAALKNAQQAQLNAQEKSLAALKAQSEEEAASARANAATAATQSALERAQASSRLATVAQNVASDLQKRTSTKAAAEAAATLRQL  
QDAERTKWSANAALEVSAAAAAAETKTTASSEAANAAKAAAIASDADGAERSASTEAQSAKIESVAAAEGSANSASEDSRAAQL  
EASTAARANVAAAAVGDGAIIGLGEEAGAAAQLLAQAKALAEVSSKSENIEDKKF

b.

VEEFKSSATEEVISKNLEVDLLKNVDTSAKRRENGAPVLGKNTLQSLEKIKTSASVNAKAAAVVKASALALAEAYLRASALSAAASA  
KAAAALKNAQQAQLNAQEKSLAALKAQSEEEAASARANAATAATQSALERAQASSRLATVAQNVASDLQKRTSTKAAAEAAATLRQL  
QDAERTKWSANAALEVSAAAAAAETKTTASSEAANAAKKAAAIASDADGAERSASTEAQSAKIESVAAAEGSANSASEDSRAAQL  
EASTAARANVAAAAVGDGAIIGLGEEAGAAAQLLAQAKALAEVSSKSENIEDKKF

Supplementary Figure 1. Protein sequence of AmelF3 with predicted coiled coil region underlined, showing in red (a) chymotryptic peptides identified by LC/MS after 15 min incubation of AmelF3 electrospun mats with  $\alpha$ -chymotrypsin, and (b) tryptic peptides identified by LC/MS after incubation of the chymotrypsin-insensitive portion of the mats with trypsin.
